# Supplementary material
Source: PubMed Central journal article supplement (PMC7324171)
Supplement: jci-130-129401-s080.pdf [file jci-130-129401-s080.pdf]

**Supplemental Materials for:**

**Bile acid metabolism is altered in multiple sclerosis and supplementation ameliorates neuroinflammation**

**Authors:** Pavan Bhargava<sup>1\*</sup>, Matthew D. Smith<sup>1†</sup>, Leah Mische<sup>1†</sup>, Emily Harrington<sup>1</sup>, Kathryn C Fitzgerald<sup>1</sup>, Kyle Martin<sup>1</sup>, Sol Kim<sup>1</sup>, Arthur Anthony Reyes<sup>1</sup>, Jaime Gonzalez-Cardona<sup>1</sup>, Christina Volsko<sup>2</sup>, Ajai Tripathi<sup>2</sup>, Sonal Singh<sup>1</sup>, Kesava Varanasi<sup>1</sup>, Hannah-Noelle Lord<sup>1</sup>, Keya Meyers<sup>1</sup>, Michelle Taylor<sup>1</sup>, Marjan Gharagozloo<sup>1</sup>, Elias S. Sotirchos<sup>1</sup>, Bardia Nourbakhsh<sup>1</sup>, Ranjan Dutta<sup>2</sup>, Ellen M. Mowry<sup>1</sup>, Emmanuelle Waubant<sup>3</sup>, Peter A. Calabresi<sup>1</sup>

**Affiliations:**

<sup>1</sup>Department of Neurology, Johns Hopkins University, Baltimore, MD, USA.

<sup>2</sup>Department of Neuroscience, Cleveland Clinic Foundation, Cleveland, OH, USA.

<sup>3</sup>Department of Neurology, University of California San Francisco, San Francisco, CA, USA.

**Supplemental Table 1. List of bile acid metabolites detected by untargeted metabolomics analyses in the discovery cohort**

| Metabolite                                      |
|-------------------------------------------------|
| Cholic Acid (CA)                                |
| Chenodeoxycholic Acid (CDCA)                    |
| Deoxycholic Acid (DCA)                          |
| Ursodeoxycholic Acid (UDCA)                     |
| Hyocholic Acid (HCA)                            |
| Glycocholic Acid (GCA)                          |
| Glycocholic Acid Sulfate (GCAS)                 |
| Glycochenodeoxycholic Acid (GCDCA)              |
| Glycochenodeoxycholic Acid Sulfate (GCDCAS)     |
| Glycochenodeoxycholic Acid Glucuronide (GCDCAg) |
| Glycodeoxycholic Acid (GDCA)                    |
| Glycodeoxycholic Acid Sulfate (GDCAS)           |
| Glycodeoxycholic Acid Glucuronide (GDCAG)       |
| Glycoursodeoxycholic Acid (GUDCA)               |
| Glycolithocholic Acid Sulfate (GLCAS)           |
| Glycohyocholic Acid (GHCA)                      |
| Taurocholic Acid (TCA)                          |
| Taurocholic Acid Sulfate (TCAS)                 |
| Taurochenodeoxycholic Acid (TCDCA)              |
| Taurodeoxycholic Acid (TDCA)                    |
| Tauroolithocholic Acid Sulfate (TLCAS)          |

**Supplemental Table 2. List of metabolites detected by targeted metabolomics analysis with range of detection in the targeted cohort**

| Analyte                            | Calibration Ranges (ng/mL) |      |
|------------------------------------|----------------------------|------|
|                                    | LLOQ                       | ULOQ |
| Cholic Acid (CA)                   | 2.50                       | 1250 |
| Chenodeoxycholic Acid (CDCA)       | 5.00                       | 2500 |
| Deoxycholic Acid (DCA)             | 5.00                       | 2500 |
| Lithocholic Acid (LCA)             | 2.50                       | 1250 |
| Ursodeoxycholic Acid (UDCA)        | 5.00                       | 2500 |
| Glycocholic Acid (GCA)             | 2.50                       | 1250 |
| Glycochenodeoxycholic Acid (GCDCA) | 5.00                       | 2500 |
| Glycodeoxycholic Acid (GDCA)       | 2.50                       | 1250 |
| Glycoursodeoxycholic Acid (GUDCA)  | 5.00                       | 2500 |
| Glycolithocholic Acid (GLCA)       | 2.50                       | 1250 |
| Taurocholic Acid (TCA)             | 2.50                       | 1250 |
| Taurochenodeoxycholic Acid (TCDCA) | 5.00                       | 2500 |
| Taurodeoxycholic Acid (TDCA)       | 5.00                       | 2500 |
| Taurolithocholic Acid (TLCA)       | 2.50                       | 1250 |
| Tauroursodeoxycholic Acid (TUDCA)  | 2.50                       | 1250 |

**Supplemental Table 3. Absolute concentrations of bile acid metabolites detected by targeted metabolomics analysis**

| Analyte                            | Healthy control |                 | RRMS   |                 | PMS    |                 |
|------------------------------------|-----------------|-----------------|--------|-----------------|--------|-----------------|
|                                    | Median          | IQR             | Median | IQR             | Median | IQR             |
| Cholic Acid (CA)                   | 9.18            | (2.5, 30.3)     | 10.15  | (2.5, 32.9)     | 4.26   | (2.5, 20)       |
| Chenodeoxycholic Acid (CDCA)       | 29.8            | (13.5, 69.1)    | 34.2   | (8.08, 112)     | 23.4   | (6.89, 57.2)    |
| Deoxycholic Acid (DCA)             | 143             | (84.4, 227)     | 165    | (54.9, 271)     | 135    | (59.9, 225)     |
| Glycocholic Acid (GCA)             | 93.9            | (44.1, 159)     | 70.4   | (29.1, 133)     | 48.6   | (23.6, 85.9)    |
| Glycochenodeoxycholic Acid (GCDCA) | 347             | (158, 673)      | 262    | (112, 525)      | 192    | (96.5, 319)     |
| Glycodeoxycholic Acid (GDCA)       | 173             | (85.5, 379)     | 166    | (70.1, 368)     | 132    | (60.4, 258)     |
| Glycoursodeoxycholic Acid (GUDCA)  | 31.7            | (16, 67.4)      | 31.55  | (14.6, 67.5)    | 28.2   | (9.41, 71.7)    |
| Glycolithocholic Acid (GLCA)       | 10.2            | (3.3, 23.3)     | 7.115  | (2.5, 18.8)     | 5.19   | (2.5, 12.4)     |
| Taurocholic Acid (TCA)             | 13.3            | (4.11, 25.3)    | 9.03   | (3.18, 20.7)    | 6.47   | (2.94, 13.6)    |
| Taurochenodeoxycholic Acid (TCDCA) | 45.5            | (22.5, 89.7)    | 29     | (13, 89.3)      | 25.6   | (11.5, 48.3)    |
| Taurodeoxycholic Acid (TDCA)       | 30.7            | (11.8, 64.8)    | 21.25  | (8.19, 62.6)    | 20.5   | (8.27, 46.9)    |
| Total Measured Bile Acids          | 1177.1          | (653.5, 1831.2) | 1054.2 | (556.0, 1623.2) | 802.6  | (490.9, 1274.5) |

\*All values are in ng/ml.

**Supplemental Table 4. List of bile acid metabolites detected by untargeted metabolomics analyses in the pediatric cohort**

| Metabolite                                       |
|--------------------------------------------------|
| Cholic Acid (CA)                                 |
| Chenodeoxycholic Acid (CDCA)                     |
| Deoxycholic Acid (DCA)                           |
| Ursodeoxycholic Acid (UDCA)                      |
| Hyocholic Acid (HCA)                             |
| Glycocholic Acid (GCA)                           |
| Glycocholic Acid Sulfate (GCAS)                  |
| Glycochenodeoxycholic Acid (GCDCA)               |
| Glycochenodeoxycholic Acid Sulfate (GCDCAS)      |
| Glycochenodeoxycholic Acid Glucuronide (GCDCAAG) |
| Glycodeoxycholic Acid (GDCA)                     |
| Glycodeoxycholic Acid Sulfate (GDCAS)            |
| Glycoursodeoxycholic Acid (GUDCA)                |
| Glycolithocholic Acid Sulfate (GLCAS)            |
| Glycohyocholic Acid (GHCA)                       |
| Glyco-alpha Muricholic Acid (GAMCA)              |
| Glyco-beta Muricholic Acid (GBMCA)               |
| Taurocholic Acid (TCA)                           |
| Taurocholic Acid Sulfate (TCAS)                  |
| Taurochenodeoxycholic Acid (TCDCA)               |
| Taurodeoxycholic Acid (TDCA)                     |
| Taurolithocholic Acid Sulfate (TLCAS)            |
| Isoursodeoxycholic Acid (IUDCA)                  |

**Supplemental Table 5. Comparison of bile acid metabolites altered between adult and pediatric MS patients**

| Metabolite                                      | Direction and significance of change in pediatric MS | Direction and significance of change in adult MS (Discovery cohort) |
|-------------------------------------------------|------------------------------------------------------|---------------------------------------------------------------------|
| Cholic Acid (CA)                                | Reduced                                              | Reduced                                                             |
| Glycocholic Acid (GCA)                          | Reduced*                                             | Reduced *** (PMS)                                                   |
| Taurocholic Acid (TCA)                          | Reduced*                                             | Reduced* (PMS)                                                      |
| Taurocholic Acid Sulfate (TCAS)                 | Reduced                                              | Reduced                                                             |
| Chenodeoxycholic Acid (CDCA)                    | Reduced                                              | Reduced* (PMS)                                                      |
| Glycochenodeoxycholic Acid (GCDCA)              | Reduced*                                             | Reduced** (PMS)                                                     |
| Glycochenodeoxycholic Acid Sulfate (GDCAS)      | Reduced                                              | Reduced* (PMS)                                                      |
| Glycochenodeoxycholic Acid Glucuronide (GCDCAg) | Reduced                                              | Reduced* (RRMS & PMS)                                               |
| Taurochenodeoxycholic Acid (TCDCA)              | Reduced*                                             | Reduced* (RRMS)                                                     |
| Ursodeoxycholic Acid (UDCA)                     | Reduced                                              | Reduced                                                             |
| Glycoursodeoxycholic Acid (GUDCA)               | Reduced                                              | Reduced                                                             |
| Hyocholic Acid (HCA)                            | Increased                                            | Reduced                                                             |
| Glyohyocholic Acid (GHCA)                       | Reduced*                                             | Reduced* (RRMS)                                                     |
| Deoxycholic Acid (DCA)                          | Increased*                                           | Reduced **                                                          |
| Glycodeoxycholic Acid (GDCA)                    | Increased                                            | Reduced** (PMS)                                                     |
| Glycodeoxycholic Acid Sulfate (GDCAS)           | Increased                                            | Reduced* (RRMS)                                                     |
| Taurodeoxycholic Acid (TDCA)                    | Reduced                                              | Reduced* (RRMS & PMS)                                               |
| Glycolithocholic Acid Sulfate (GLCAS)           | Increased                                            | Reduced** (RRMS & PMS)                                              |
| Taurolithocholic Acid Sulfate (TLCAS)           | Reduced                                              | Reduced                                                             |

**Supplemental Table 6. List of primers for murine astrocyte and microglial qPCR**

| <b>Name</b> | <b>Forward Primer</b>   | <b>Reverse Primer</b>     |
|-------------|-------------------------|---------------------------|
| Amigo2      | GAGGCGACCATAATGTCGTT    | GCATCCAACAGTCCGATTCT      |
| Arg1        | TTTTAGGGTTACGGCCGGTG    | CCTCGAGGCTGTCCTTTTGA      |
| b actin     | ACCTTCTACAATGAGCTGCG    | CTGGATGGCTACGTACATGG      |
| C1q         | TCTGCACTGTACCCGGCTA     | CCCTGGTAAATGTGACCCTTTT    |
| C3          | AGCTTCAGGGTCCCAGCTAC    | GCTGGAATCTTGATGGAGACGC    |
| Cd14        | GGACTGATCTCAGCCCTCTG    | GCTTCAGCCCAGTGAAAGAC      |
| Clcf1       | CTTCAATCCTCCTCGACTGG    | TACGTCGGAGTTCAGCTGTG      |
| Cp          | TGTGATGGGAATGGGCAATGA   | AGTGTATAGAGGATGTTCCAGGTCA |
| Fkbp5       | TATGCTTATGGCTCGGCTGG    | CAGCCTTCCAGGTGGACTTT      |
| Gbp2        | GGGGTCACTGTCTGACCACT    | GGGAAACCTGGGATGAGATT      |
| Ggtal       | GTGAACAGCATGAGGGGTTT    | GTTTTGTTGCCTCTGGGTGT      |
| H2-D1       | TCCGAGATTGTAAAGCGTGAAGA | ACAGGGCAGTGCAGGGATAG      |
| H2-T23      | GGACCGCGAATGACATAGC     | GCACCTCAGGGTGACTTCAT      |
| Iigp1       | GGGGCAATAGCTCATTGGTA    | ACCTCGAAGACATCCCCTTT      |
| Il1a        | CGCTTGAGTCGGCAAAGAAAT   | CTTCCCGTTGCTTGACGTTG      |
| NOS2        | GCAAACATCACATTCAGATCCC  | TCAGCCTCATGGTAAACACG      |
| Lcn2        | CCAGTTCGCCATGGTATTTT    | CACACTCACCACCCATTTCAG     |
| Psmb8       | CAGTCCTGAAGAGGCCTACG    | CACTTTCACCCAACCGTCTT      |
| Ptx3        | AACAAGCTCTGTTGCCCAT     | TCCCAAATGGAACATTGGAT      |
| Serping1    | ACAGCCCCCTCTGAATTCTT    | GGATGCTCTCCAAGTTGCTC      |
| S1pr3       | AAGCCTAGCGGGAGAGAAAC    | TCAGGGAACAATTGGGAGAG      |
| Slc10a6     | GCTTCGGTGGTATGATGCTT    | CCACAGGCTTTTCTGGTGAT      |
| Sgrn        | GCAAGGTTATCCTGCTCGGA    | TGGGAGGGCCGATGTTATTG      |
| Steap4      | CCCGAATCGTGTCTTTCCTA    | GGCCTGAGTAATGGTTGCAT      |
| Timp1       | AGTGATTTCCTCCGCAACTC    | GGGGCCATCATGGTATCTGC      |
| Tm4sf1      | GCCCAAGCATATTGTGGAGT    | AGGGTAGGATGTGGCACAAG      |
| Tnfa        | TGTGCTCAGAGCTTTCAACAA   | CTTGATGGTGGTGCATGAGA      |

**Supplemental Table 7. List of antibodies utilized for IHC of MS and EAE tissue**

**EAE tissue**

| <b>Antibody</b> | <b>Manufacturer</b>       | <b>Catalog #</b> | <b>Clone</b>     | <b>Isotype</b> | <b>Host</b> | <b>Dilution</b> |
|-----------------|---------------------------|------------------|------------------|----------------|-------------|-----------------|
| GFAP            | Dako                      | GA52461-2        | Polyclonal       | IgG            | Rabbit      | 1:1000          |
| GFAP            | Cell Signaling Technology | 3670             | Mono             | IgG1           | Mouse       | 1:250           |
| Iba-1           | Wako                      | 019-19741        | Polyclonal       |                | Rabbit      | 1:300           |
| iNos            | Santa Cruz Biotechnology  | sc-7271          | Mono; NOS2(C-11) | IgG1           | Mouse       | 1:1000          |
| CD3             | Dako                      | A045201-2        | Polyclonal       |                | Rabbit      | 1:200           |
| Mac-2           | BioLegend                 | 125401           | Mono; M3/38      | IgG2a          | Rat         | 1:200           |
| PSMB8           | Invitrogen                | MA5-15890        | Mono; 1A5        | IgG1           | Mouse       | 1:200           |
| GPBAR1          | Abcam                     | ab72608          | Polyclonal       | IgG            | Rabbit      | 1:100           |

**MS tissue**

| <b>Antibody</b> | <b>Manufacturer</b>      | <b>Catalog #</b> | <b>Clone</b> | <b>Isotype</b> | <b>Host</b> | <b>Dilution</b> |
|-----------------|--------------------------|------------------|--------------|----------------|-------------|-----------------|
| FXR             | Perseus Proteomics Inc   | PP-A9033A-00     | Monoclonal   | IgG            | Mouse       | 1:500           |
| GPBAR1          | Thermo Fisher Scientific | PA5-27076        | Polyclonal   | IgG            | Rabbit      | 1:250           |
| GFAP            | Millipore                | MAB3402          | Monoclonal   | IgG1           | Mouse       | 1:250           |
| CD68            | Dako                     | M0876            | Monoclonal   | IgG3           | Mouse       | 1:250           |

**Supplemental Table 8. Demographics of MS patients and controls utilized for bile acid receptor staining**

| <b>Case#</b> | <b>MS type</b> | <b>Age</b> | <b>Sex</b> | <b>Disease duration (Yr)</b> | <b>EDSS</b> | <b>PMI (h)</b> | <b>Lesion types</b>                                                        |
|--------------|----------------|------------|------------|------------------------------|-------------|----------------|----------------------------------------------------------------------------|
| MS1 (25)     | SPMS           | 56         | M          | 32                           | 9.5         | 3              | Mixed Active/inactive and demyelinating                                    |
| MS2 (115)    | SPMS           | 67         | M          | 25                           | 8           | 11             | Active/inactive and post-demyelinating                                     |
| MS3 (160)    | SPMS           | 35         | M          | 21                           | 9.5         | 8              | Active and demyelinating lesion<br>Mixed Active/inactive and demyelinating |

**Controls**

| <b>Case#</b> | <b>Age</b> | <b>Sex</b> | <b>PMI (h)</b> | <b>Cause of death</b>  |
|--------------|------------|------------|----------------|------------------------|
| Ctrl-1       | 53         | F          | 36             | Cardiopulmonary arrest |
| Ctrl-2       | 72         | M          | 30             | Unknown                |
| Ctrl-3       | 96         | F          | 9              | Unknown                |

**Supplemental Table 9: Demographics of MS patients used for qPCR**

| <b>Case#</b> | <b>MS types</b> | <b>Age (yrs)</b> | <b>Sex</b> | <b>Disease duration (Yrs)</b> | <b>EDSS</b> | <b>PMI (h)</b> | <b>Tissue type</b> |
|--------------|-----------------|------------------|------------|-------------------------------|-------------|----------------|--------------------|
| 1            | SPMS            | 61               | F          | 35                            | 9.5         | 10             | NAWM, WML          |
| 2            | PPMS            | 57               | F          | 15                            | 6.5         | 6              | NAWM               |
| 3            | SPMS            | 52               | M          | 25                            | 9.5         | 5              | NAWM               |
| 4            | SPMS            | 50               | F          | 24                            | 8           | 7              | NAWM               |
| 5            | PPMS            | 51               | F          | 15                            | 7.5         | 7              | WML                |
| 6            | SPMS            | 62               | M          | 42                            | 9.5         | 5              | WML                |
| 7            | SPMS            | 59               | F          | 25                            | 9           | 10             | WML                |

**Supplemental Table 10: Antibodies utilized for flow cytometry in EAE and in vitro T cell stimulation**

| <b>Product</b>       | <b>Clone</b> | <b>Conjugate</b> | <b>Manufacturer</b> |
|----------------------|--------------|------------------|---------------------|
| Viability 405/520    | N/A          | N/A              | Miltenyi            |
| TruStain Ms Fc Block | 93           | N/A              | Biolegend           |
| CD3 $\epsilon$       | 145-2C11     | APC/Fire750      | Biolegend           |
| CD25                 | PC61         | PerCP/Cy5.5      | Biolegend           |
| CD4                  | GK1.5        | eFluor450        | ThermoFisher        |
| CD8                  | 53-6.7       | PE/Cy7           | Biolegend           |
| FoxP3                | FJK-16s      | PE               | ThermoFisher        |
| IFN $\gamma$         | XMG1.2       | FITC             | ThermoFisher        |
| IL-17a               | eBio17B7     | APC              | ThermoFisher        |
| CD69                 | H1.2F3       | FITC             | BD Biosciences      |
| CD62L                | MEL-14       | PE/Cy7           | Biolegend           |
| CD44                 | IM7          | APC/eFluor780    | ThermoFisher        |

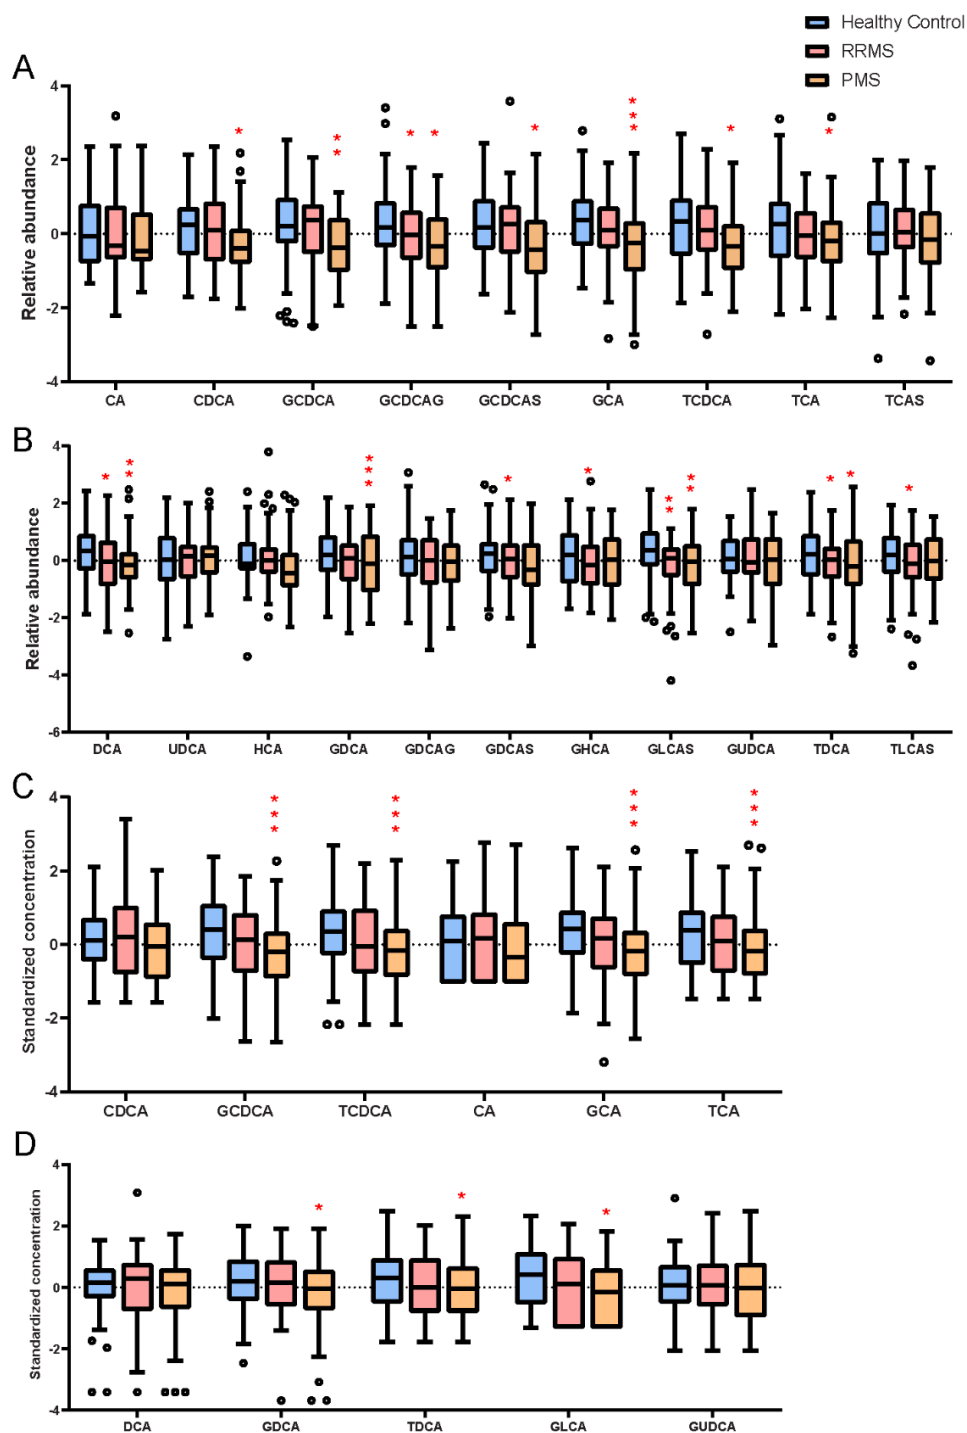

**Supplemental Figure 1. Individual bile acid metabolites from adult cohorts**

Box plots of primary bile acid metabolite relative abundances in the discovery cohort are shown in (A), while relative abundances of secondary bile acid metabolites are shown in (B). (C) Standardized concentrations of primary bile acids in the validation cohort, while (D) depicts standardized concentrations of secondary bile acids in the validation cohort. Red asterisks depict statistical significance of comparison to the control group with p values derived from multivariate regression models adjusting for age, sex and race (\*  $p < 0.05$ , \*\*  $p < 0.01$ , \*\*\*  $p < 0.005$ ). For all box plots – center line – median, box – 25<sup>th</sup> and 75<sup>th</sup> percentiles, whiskers – 1.5 x interquartile range and points – outliers.

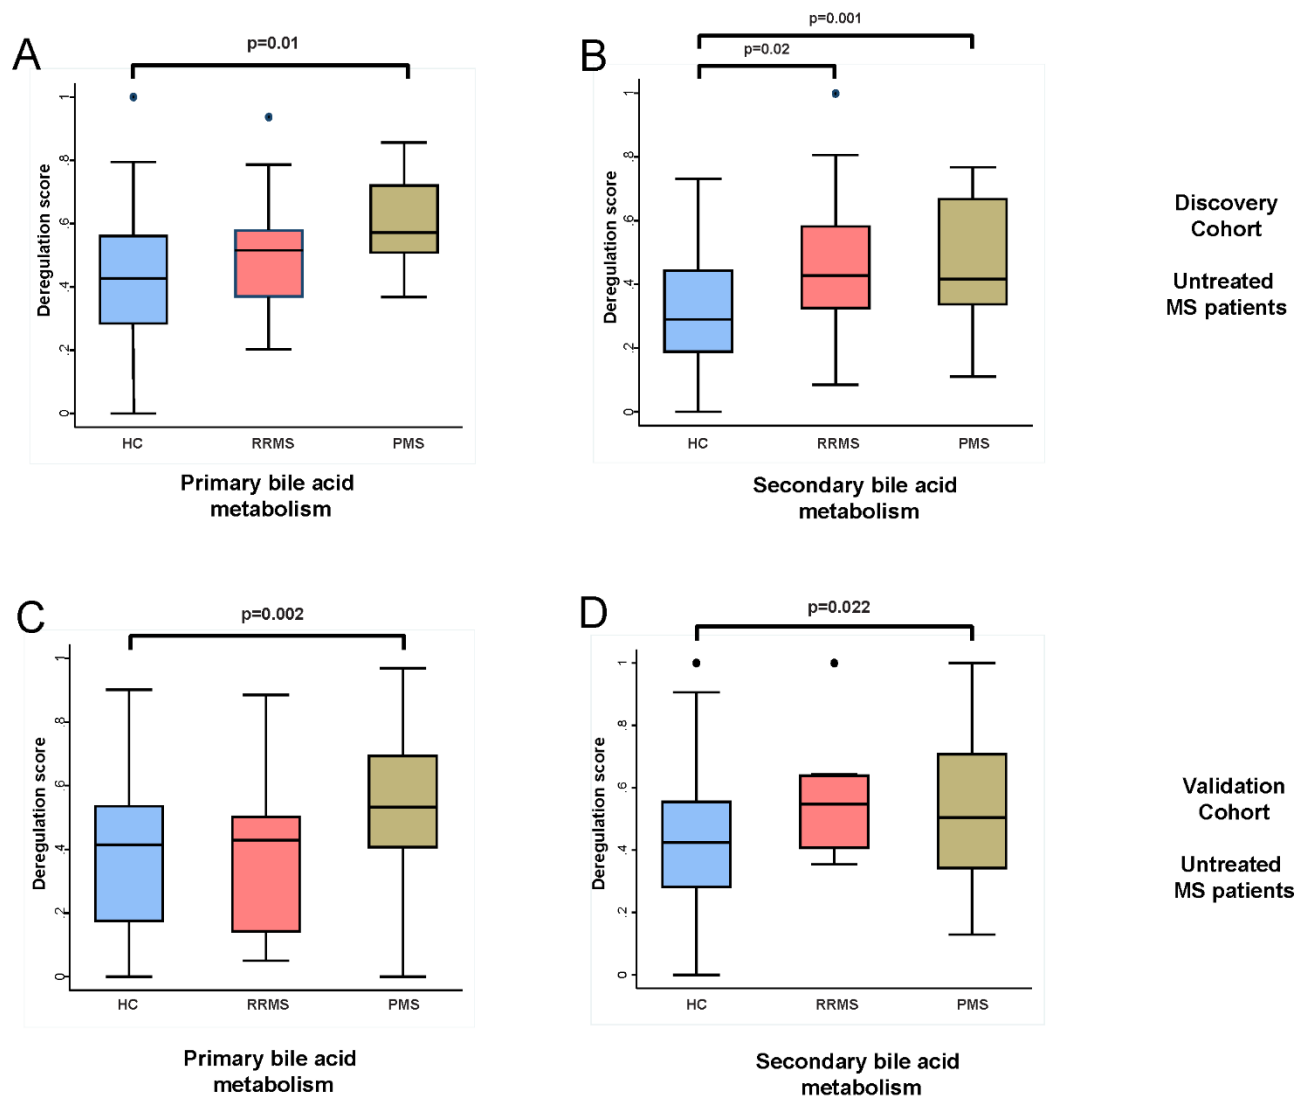

**Supplemental Figure 2. Comparison of bile acid metabolism in adult cohorts restricting to untreated MS patients**

Box plots of pathway deregulation scores for primary (A) and secondary (B) bile acid metabolism pathways in the discovery cohort restricting to untreated MS patients demonstrated alterations which were consistent with results from the entire cohort. Pathway deregulation scores for primary (C) and secondary (D) bile acid metabolism pathways in the validation cohort restricting to untreated MS patients were again consistent with results derived from the entire cohort. p values for A-D are derived from a one-way ANOVA. For all box plots – center line – median, box – 25<sup>th</sup> and 75<sup>th</sup> percentiles, whiskers – 1.5 x interquartile range and points – outliers.

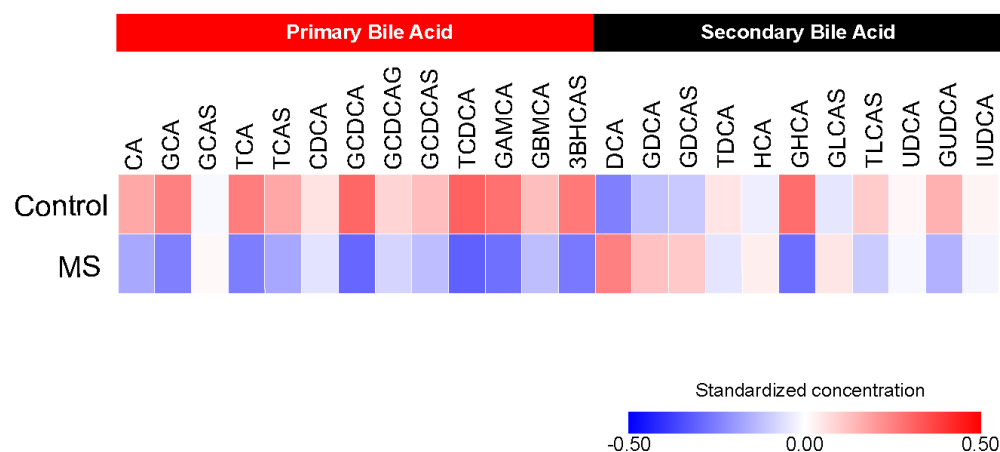

### Supplemental Figure 3. Heatmap of bile acid metabolite abundance from the pediatric cohort

Heat map of mean standardized relative abundance of various bile acid metabolites (primary and secondary bile acid metabolites) identified in the circulation of pediatric-onset MS patients and healthy controls. CA – cholic acid, GCA – glycocholic acid, GCAS – glychocholic acid sulfate, TCA – taurocholic acid, TCAS – taurocholic acid sulfate, CDCA – chenodeoxycholic acid, GCDCA – glycochenodeoxycholic acid, GCDCAG – glycochenodeoxycholic acid glucuronide, GDCAS – glycochenodeoxycholic acid sulfate, TCDC – taurochenodeoxycholic acid, GAMCA – glycoalpha-muricholic acid, GBMCA – glycobeta-muricholic acid, 3BHCAS – 3-beta hydroxy-5-cholenoic acid, DCA – deoxycholic acid, GDCA – glycodeoxycholic acid, GDCAS – glycodeoxycholic acid sulfate, TDCA -taurodeoxycholic acid, HCA - hyocholic acid, GHCA -glyohyocholic acid, GLCAS -glycolithocholic acid sulfate, TLCAS – tauroolithocholic acid sulfate, UDCA – ursodeoxycholic acid, GUDCA – glycoursoxycholic acid, IUDCA – isoursodeoxycholic acid.

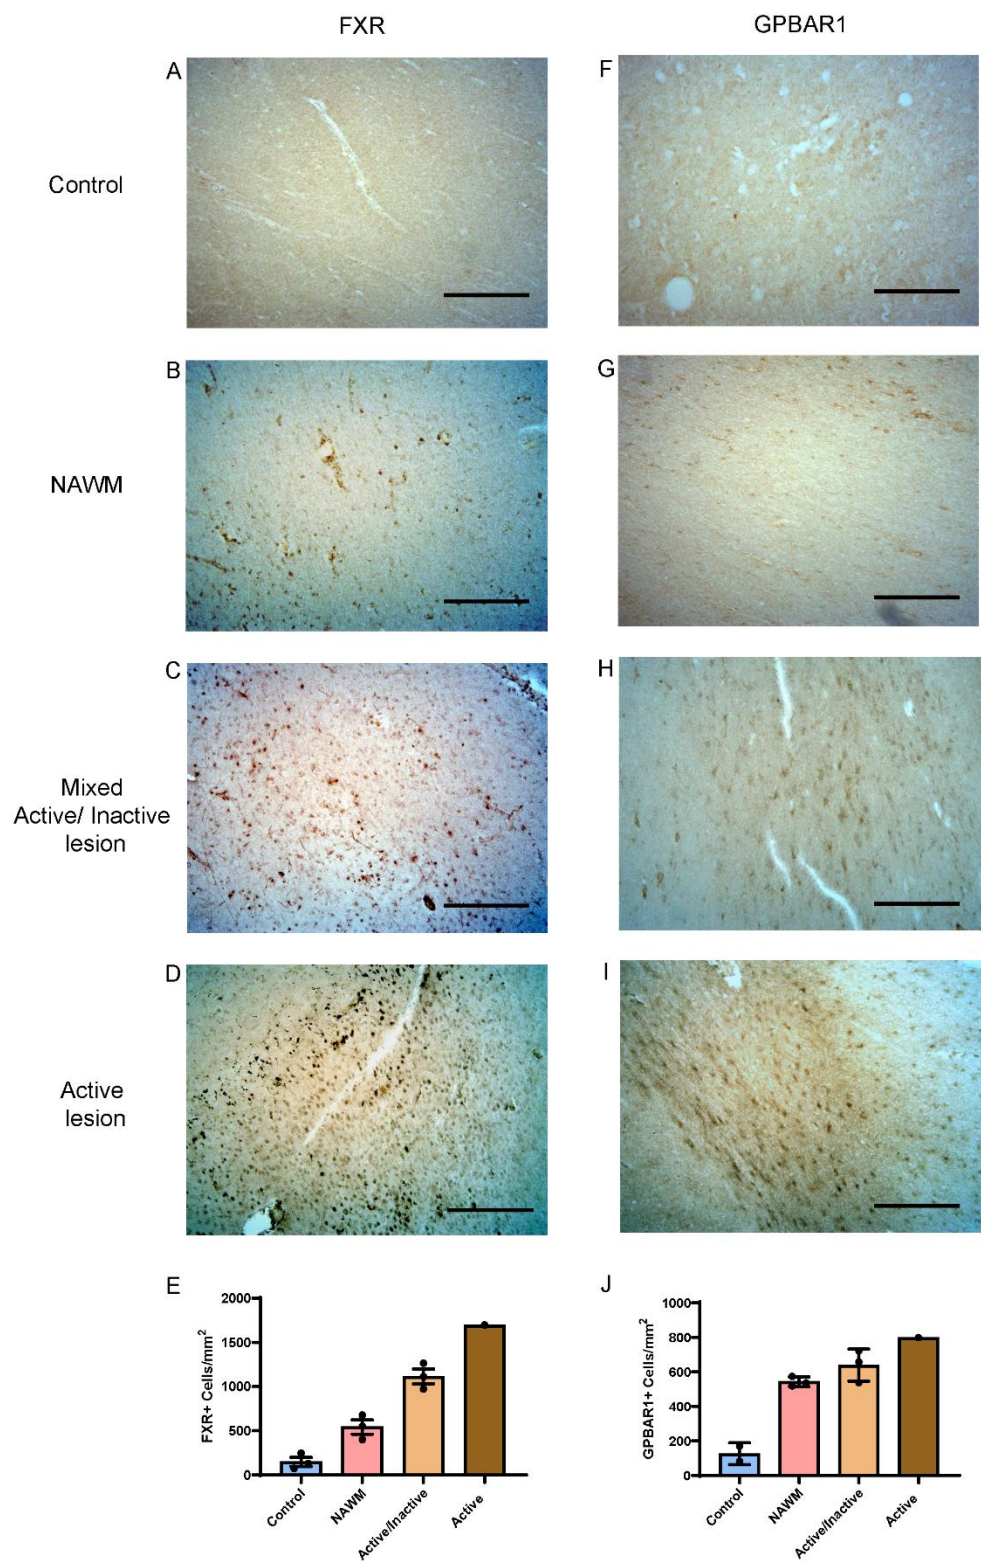

**Supplemental Figure 4. Comparison of bile acid receptor expression in control and MS brain tissue**

Immunohistochemistry for FXR in control (A), MS normal-appearing white matter (NAWM) (B), mixed active/inactive lesion (C) and an active lesion (D). Staining is quantified in (E). Immunohistochemistry for GPBAR1 in control (F), NAWM (G), mixed active/inactive lesion (H) and active lesion (I). This staining is quantified in (J). Scale bars in all images: A-D and F-I are 200  $\mu$ m. For E and J – Bars represent mean and error-bars represent s.e.m.

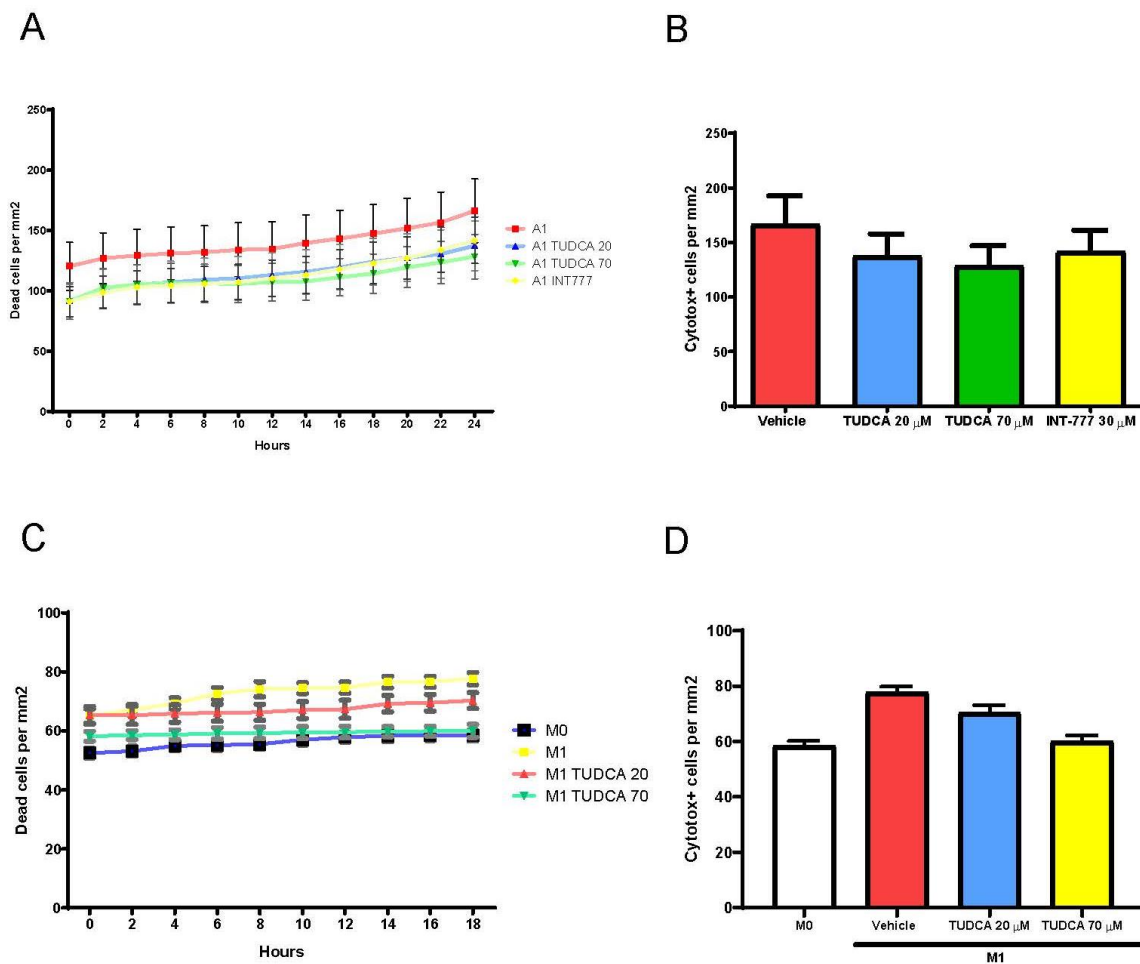

### Supplemental Figure 5. TUDCA treatment does not adversely affect the viability of murine astrocytes or microglia

(A) We assessed viability of astrocytes, over a 24-hour period, in various culture conditions – A1 polarizing conditions (IL-1 $\alpha$ , TNF- $\alpha$  and C1q) plus vehicle or varying doses of TUDCA or INT-777, using labelling with a cell viability dye and noted no increase in cell death with the addition of TUDCA or INT-777. (B) Quantification of cell death at the 24-hour time point. (C) We performed similar assessments, over an 18-hour period, in microglial cultures – either M0 condition or M1 polarization (IFN- $\gamma$  and LPS) either with vehicle or varying doses of TUDCA and noted no increased cell death in the TUDCA conditions compared to vehicle. (D) Quantification of cell death at the 18-hour time point. Points in A and C and bars in B and D represent the mean. Error bars in A-D represent standard error of the mean.

A

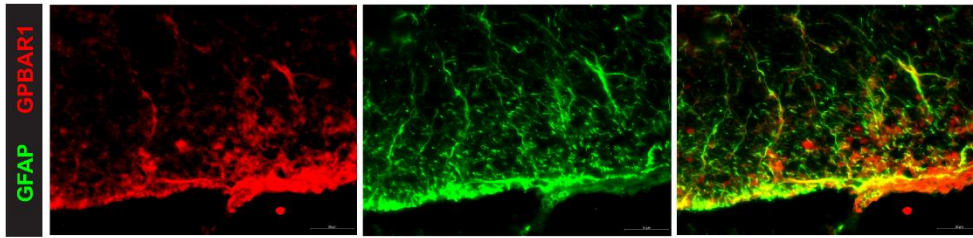

B

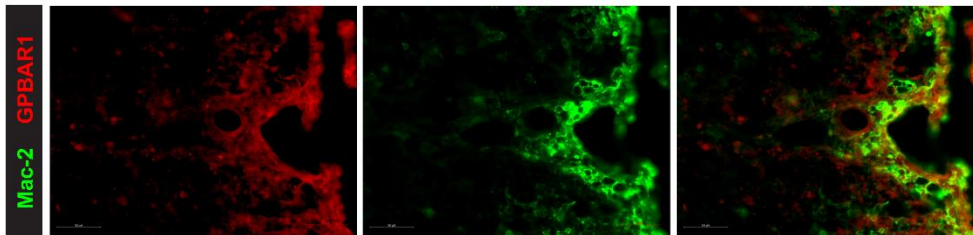

**Supplemental Figure 6. Bile acid receptors are found on astrocytes and microglia/macrophages in EAE**

(A) Immunohistochemistry for GFAP and GPBAR1 on spinal cord sections from mice with EAE, demonstrates the presence of several GPBAR1+ GFAP+ astrocytes. (B) We also performed immunohistochemistry for Mac-2 which stains myeloid cells and GPBAR-1, which revealed the presence of several GPBAR-1+ Mac-2+ cells in the spinal cord of EAE mice.

A

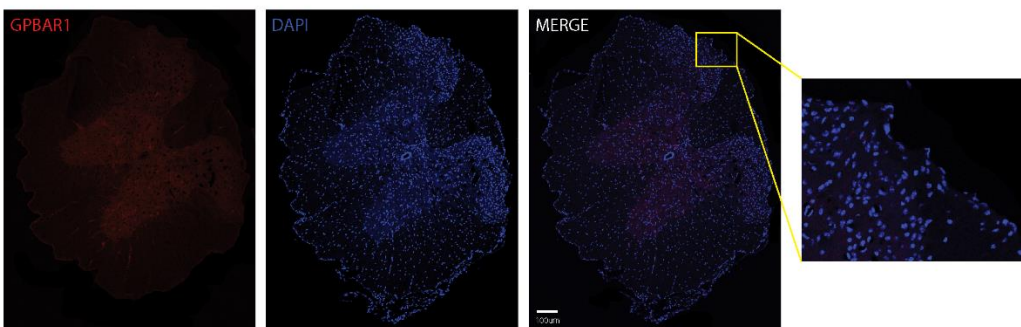

B

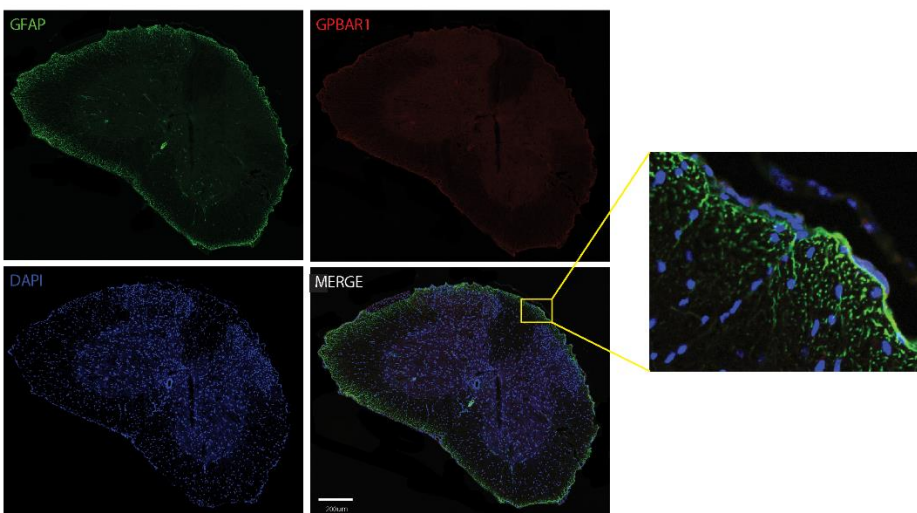

C

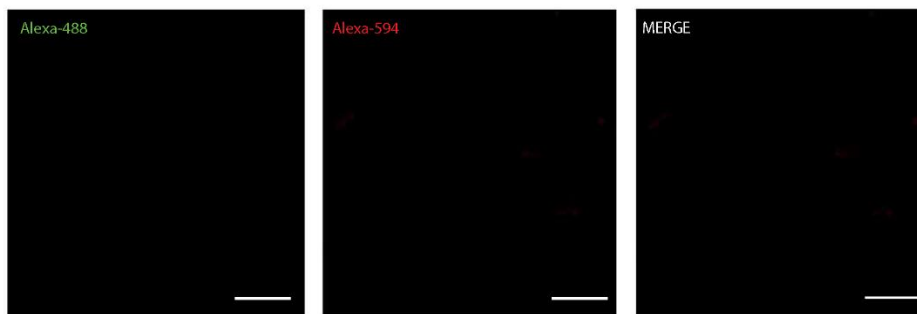

**Supplemental Figure 7. Validation of Bile acid receptor staining in EAE and MS tissue**

(A) Immunohistochemistry on spinal cord sections from mice with EAE in the absence of primary antibody for GPBAR1 demonstrates lack of staining for the receptor. (B) We also performed immunohistochemistry for GPBAR1 and GFAP in the spinal cord of GPBAR1-KO mice and noted no staining for GPBAR1. (C) Immunohistochemistry on a mixed active/inactive lesions from an MS patient in the absence of the primary antibody for GPBAR1 demonstrated lack of staining for the receptor.

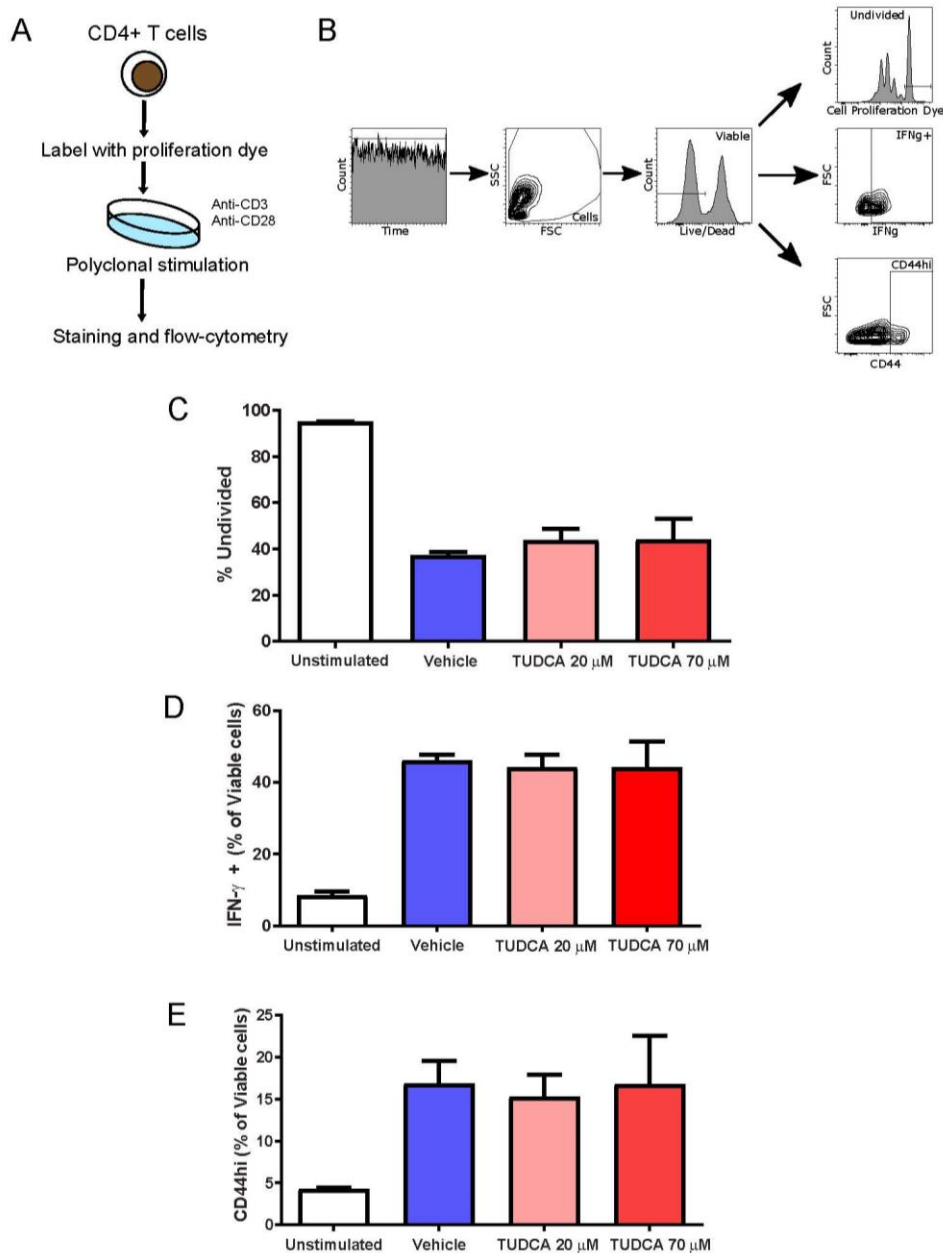

### Supplemental Figure 8. TUDCA treatment does not affect murine T cell proliferation and cytokine production

(A) Murine CD4<sup>+</sup> T cells isolated using negative bead selection from mouse splenocytes were stained with cell proliferation dye and then cultured in c-RPMI and polyclonally stimulated with anti-CD3 and anti-CD28 antibodies, in the presence or absence of varying doses of TUDCA. Following 72 hours of stimulation, we performed flow cytometry (gating strategy depicted in (B)) and noted no significant effect of low- or high-dose TUDCA on T cell proliferation compared to vehicle (C). We also noted no significant effects of TUDCA treatment on (D) interferon-gamma production or (E) T cell activation – based on CD44 expression (CD44<sup>hi</sup>). Data is derived from a representative experiment (one of three independent experiments). Bars in C-E represent the mean. Error bars in C-E represent standard error of the mean.

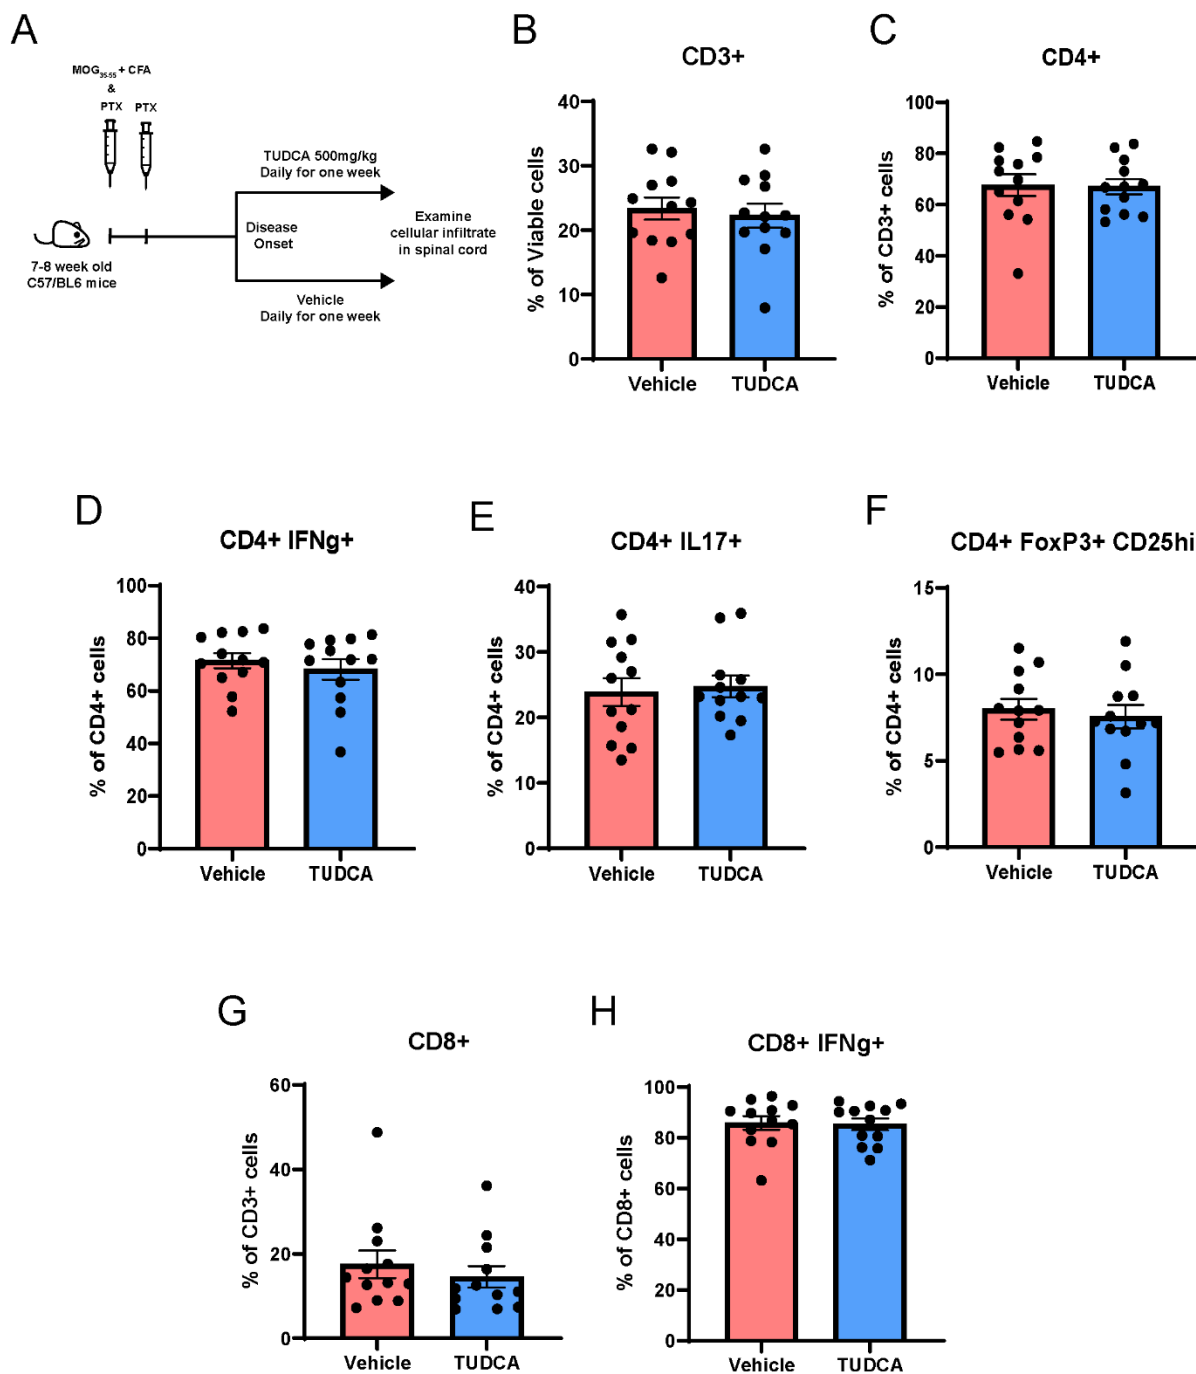

**Supplemental Figure 9. TUDCA treatment in EAE does not affect CNS T cell infiltration and phenotype**

(A) C57/BL6 mice with EAE were treated at disease onset with either vehicle or TUDCA 500 mg/kg for one week and CNS tissue was obtained for evaluation of cellular infiltrate in the spinal cord. There was no difference in the infiltration of T cells (B) or CD4+ T cells (C) in the spinal cord between the two groups. We noted no differences in the proportion of CD4+ T cells producing pro-inflammatory cytokines – interferon gamma (IFN $\gamma$ ) (D) or interleukin-17 (IL-17) (E). There was also no difference in the proportion of regulatory T cells (CD4+ FoxP3+ CD25<sup>hi</sup>) between the groups (F). There was no difference in the infiltration of CD8+ T cells between the groups (G) and the proportion of IFN $\gamma$ -producing CD8+ T cells was also similar between the groups (H). In B-H bars represent mean and error bars represent s.e.m. Data is derived from two independent experiments.
